# Supplementary material for: Intestinal Helminth Infections and Nutritional Status of Children Attending Primary Schools in Wakiso District, Central Uganda
Source: MDPI journal article supplement (doi:10.3390/ijerph9082910), 2012-08-16
Supplement: s1 [file s1]

*Correction*

**Correction: Lwanga, F., *et al.* Intestinal Helminth Infections and Nutritional Status of Children Attending Primary Schools in Wakiso District, Central Uganda. *Int. J. Environ. Res. Public Health* **2012**, *9*, 2910–2921**

**Francis Lwanga <sup>1,\*</sup>, Barbara Eva Kirunda <sup>2</sup> and Christopher Garimoi Orach <sup>1</sup>**

<sup>1</sup> Department of Community Health and Behavioral Sciences, Makerere University School of Public Health, Kampala, Central Region, +256, Uganda; E-Mail: cgorach@musph.ac.ug

<sup>2</sup> Department of Epidemiology and Biostatistics, Makerere University School of Public Health, Kampala, Central Region, +256, Uganda; E-Mail: bkirunda@musph.ac.ug

\* Author to whom correspondence should be addressed; E-Mail: lwanga.francis@yahoo.com; Tel.: +256-414-543-872; Fax: +256-414-531-807.

*Received: 29 August 2012 / Published: 23 October 2012*

---

The author wish to make the following correction to this paper [1]: The author name “Lwanga Francis” should be “Francis Lwanga”.

**Reference**

1. Lwanga, F.; Kirunda, B.E.; Orach, C.G. Intestinal helminth infections and nutritional status of children attending primary schools in Wakiso District, Central Uganda. *Int. J. Environ. Res. Public Health* **2012**, *9*, 2910–2921.

© 2012 by the authors; licensee MDPI, Basel, Switzerland. This article is an open access article distributed under the terms and conditions of the Creative Commons Attribution license (<http://creativecommons.org/licenses/by/3.0/>).
